# Supplementary material
Source: MDPI journal article supplement (https://www.mdpi.com/2071-1050/12/10/4030)
Supplement: s1 [file s1]

## Sheet: Dataset 4 cities
	Original table Negar
	Smart City facets	Design Variables	Indicators	Amsterdam	Barcelona	Dubai	Masdar
	HR and Entruprunership	Educating & training people	Supporting and sterngthening universities and reserch centers	+++	++	++	++	HR1
		Transferring (attracting) educated and skilled people	Lunching knowledge transfer projects (scholarships, sabbatical,..)	+++	+	++	++	HR2
		Nurture the innovation environment	Specific policy in place to promote innovation	+++	+++	+	+	HR3
		Attracting innovative companies	Supporting and encouraging programs for innovatie companies (Science and technology parks, freezones,..)	+++	++	+++	++	HR4
	ICT and Data	Data aggregation	Big data establishment	++	++	+++	++	D1
		Data processing	Data science centers	++	++	++	0	D2
		Data real-time analysis	Data visualization	+	++	++	+	D3
	Financial resources	Supra-national and national investment	Supra-national and national smart city development policy and budget	+++	+++	++	++	F1
		Local government investment	Smart city profile and allocated budget	++	++	+++	+++	F2
		Public-private investment	Collaboration with private sector	+++	++	++	++	F3
		Foreign investment	International brand and investors	++	++	++	++	F4
	Smart Mobility	Smart transportation infrastuctures	Smart roads &trafic lights, smart parkings, bicycle routes	+++	+++	++	+	SM1
		Smart public transportation	Interconnected public transportaion, smart vehichels, information application	+++	+++	+	+	SM2
		Smart private transportation	Evs, autonomous driving, car-sharing	+++	++	++	+	SM3
		Smart Mobility Average		+++	+++	++	+	SMAVG
	Smart energy	Renwable energy	Stationary energy use to be supplied by renewable energy sources	++	++	+	+	SE1
		buildings energy efficiency	buliding regulations, energy certificates	++	++	+++	++	SE2
		New technologies for utilities	smart grids, smart meters	+	++	+	++	SE3
		Smart Energy average		++	++	++	++	SEAVG
	Smart health	smart health monitoring systems	remote health monitoring, mobile health monitoring, wearable health motinoting	+	+	++	0	SH1
		Smart health management and information applications	mobile applications for medication information, weight management, information regarding hospitals and clinics, etc.	+	+	++	+	SH2
		Smart health average		+	+	++	+	SHAVG
	Smart citizens	One-way communication	A participation platform for data sharing	++	++	++	+	SC1
		Two-way communication	A participation platform for idea sharing	+++	++	+	+	SC2
		Co-creating and co-designing	A participation platform for cooperative policies	++	++	+	0	SC3
		Smart city average		++	++	+	+	SCAVG
	smart governance	Smart administration	redesigning norms based on smart solutions (technologies)	0	++	++	++	SG1
		Smart interaction	participation and collaboration via social media and social networking	++	+++	+++	+++	SG2
		Smart security and safety	using smart devices and data analytics for surveillance	n/a	n/a	n/a	n/a	SG3
		Smart policies	using big data analytics for decision-making	++	++	++	+	SG4
		Smart governance average		+	++	++	++	SGAVG
	Transposed table
	Smart City facets	HR and Entruprunership				ICT and Data			Financial resources				Smart Mobility			Smart energy				Smart health			Smart citizens				smart governance
	Design Variables	Educating & training people	transfertring (attracting) educated and skilled people	Nurture the innovation environment	Attracting innovative companies	Data aggregation	Data processing	Data real-time analysis	Supra-national and national investment	Local government investment	Public-private investment	Foreign investment	Smart transportation infrastuctures	Smart public transportation	Smart private transportation	Renwable energy	buildings energy efficiency	New technologies for utilities	Smart Energy average	smart health monitoring systems	Smart health management and information applications	Smart health average	on-way communication	Two-way communication	co-creating and co-designing	Smart city average	smart administration	smart interaction	smart security and safety	smart policies	Smart governance average
	Indicators	Supporting and sterngthening universities and reserch centers	Lunching knowledge transfer projects (scholarships, sabbatical,..)	Specific policy in place to promote innovation	Supporting and encouraging programs for innovatie companies (Science and technology parks, freezones,..)	Big data establishment	Data science centers	Data visualization	Supra-national and national smart city development policy and budget	Smart city profile and allocated budget	Collaboration with private sector	International brand and investors	Smart roads &trafic lights, smart parkings, bicycle routes	Interconnected public transportaion, smart vehichels, information application	Evs, autonomous driving, car-sharing	Stationary energy use to be supplied by renewable energy sources	buliding regulations, energy certificates	smart grids, smart meters		remote health monitoring, mobile health monitoring, wearable health motinoting	mobile applications for medication information, weight management, information regarding hospitals and clinics, etc.		A participation platform for data sharing	A participation platform for idea sharing	A participation platform for cooperative policies		redesigning norms based on smart solutions (technologies)	participation and collaboration via social media and social networking	using smart devices and data analytics for surveillance	using big data analytics for decision-making
	Amsterdam	+++	+++	+++	+++	++	++	+	+++	++	+++	++	+++	+++	+++	++	++	+	++	+	+	+	++	+++	++	++	0	++	n/a	++	+
	Barcelona	++	+	+++	++	++	++	++	+++	++	++	++	+++	+++	++	++	++	++	++	+	+	+	++	++	++	++	++	+++	n/a	++	++
	Dubai	++	++	+	+++	+++	++	++	++	+++	++	++	++	+	++	+	+++	+	++	++	++	++	++	+	+	+	++	+++	n/a	++	++
	Masdar	++	++	+	++	++	0	+	++	+++	++	++	+	+	+	+	++	++	++	0	+	+	+	+	0	+	++	+++	n/a	+	++
		HR1	HR2	HR3	HR4	D1	D2	D3	F1	F2	F3	F4	SM1	SM2	SM3	SE1	SE2	SE3	SEAVG	SH1	SH2	SHAVG	SC1	SC2	SC3	SCAVG	SG1	SG2	SG3	SG4	SGAVG
	Smart City facets	HR and Entruprunership				ICT and Data			Financial resources				Smart Mobility			Smart energy				Smart health			Smart citizens				smart governance
	Design Variables	Educating & training people	transfertring (attracting) educated and skilled people	Nurture the innovation environment	Attracting innovative companies	Data aggregation	Data processing	Data real-time analysis	Supra-national and national investment	Local government investment	Public-private investment	Foreign investment	Smart transportation infrastuctures	Smart public transportation	Smart private transportation	Renwable energy	buildings energy efficiency	New technologies for utilities	Smart Energy average	smart health monitoring systems	Smart health management and information applications	Smart health average	on-way communication	Two-way communication	co-creating and co-designing	Smart city average	smart administration	smart interaction	smart security and safety	smart policies	Smart governance average
	Indicators	HR1	HR2	HR3	HR4	D1	D2	D3	F1	F2	F3	F4	SM1	SM2	SM3	SE1	SE2	SE3	SEAVG	SH1	SH2	SHAVG	SC1	SC2	SC3	SCAVG	SG1	SG2	SG3	SG4	SGAVG
	Amsterdam	3	3	3	3	2	2	1	3	2	3	2	3	3	3	2	2	1	2	1	1	1	2	3	2	2	0	2	n/a	2	1
	Barcelona	2	1	3	2	2	2	2	3	2	2	2	3	3	2	2	2	2	2	1	1	1	2	2	2	2	2	3	n/a	2	2
	Dubai	2	2	1	3	3	2	2	2	3	2	2	2	1	2	1	3	1	2	2	2	2	2	1	1	1	2	3	n/a	2	2
	Masdar	2	2	1	2	2	0	1	2	3	2	2	1	1	1	1	2	2	2	0	1	1	1	1	0	1	2	3	n/a	1	2

## Sheet: Correlation input-output
	Correlations
			Educating & training people	Transferring (attracting) educated and skilled people	Nurture the innovation environment	Attracting innovative companies	Data aggregation	Data processing	Data real-time analysis	Supra-national and national investment	Local government investment	Public-private investment	Foreign investment	Smart transportation infrastuctures	Smart public transportation	Smart private transportation	Renewable energy	Buildings energy efficiency	New technologies for utilities	Smart Energy average	Smart health monitoring systems	Smart health management and information applications	Smart health average	One-way communication	Two-way communication	Co-creating and co-designing	Smart city average	Smart administration	Smart interaction	Smart security and safety	Smart policies	Smart governance average	Smart Mobility Average
	Educating & training people	Pearson Correlation	1	0.816497	0.57735	0.57735	-0.333333	0.333333	-0.57735	0.57735	-0.57735	1,000**	.b	0.522233	0.57735	0.816497	0.57735	-0.333333	-0.57735	.b	0	-0.333333	-0.333333	0.333333	0.870388	0.522233	0.57735	-1,000**	-1,000**	.b	0.333333	-1,000**	0.522233
		Sig. (1-tailed)		0.0917517	0.211325	0.211325	0.333333	0.333333	0.211325	0.211325	0.211325	0		0.238884	0.211325	0.0917517	0.211325	0.333333	0.211325		0.5	0.333333	0.333333	0.333333	0.0648059	0.238884	0.211325	0	0		0.333333	0	0.238884
		N	4	4	4	4	4	4	4	4	4	4	4	4	4	4	4	4	4	4	4	4	4	4	4	4	4	4	4	0	4	4	4
	Transferring (attracting) educated and skilled people	Pearson Correlation	0.816497	1	0	0.707107	0	0	-0.707107	0	0	0.816497	.b	0	0	0.5	0	0	-0.707107	.b	0	0	0	0	0.426401	0	0	-0.816497	-0.816497	.b	0	-0.816497	0
		Sig. (1-tailed)	0.0917517		0.5	0.146447	0.5	0.5	0.146447	0.5	0.5	0.0917517		0.5	0.5	0.25	0.5	0.5	0.146447		0.5	0.5	0.5	0.5	0.286799	0.5	0.5	0.0917517	0.0917517		0.5	0.0917517	0.5
		N	4	4	4	4	4	4	4	4	4	4	4	4	4	4	4	4	4	4	4	4	4	4	4	4	4	4	4	0	4	4	4
	Nurture the innovation environment	Pearson Correlation	0.57735	0	1	0	-0.57735	0.57735	0	1,000**	-1,000**	0.57735	.b	,905*	1,000**	0.707107	1,000**	-0.57735	0	.b	0	-0.57735	-0.57735	0.57735	,905*	,905*	1,000**	-0.57735	-0.57735	.b	0.57735	-0.57735	,905*
		Sig. (1-tailed)	0.211325	0.5		0.5	0.211325	0.211325	0.5	0	0	0.211325		0.047733	0	0.146447	0	0.211325	0.5		0.5	0.211325	0.211325	0.211325	0.047733	0.047733	0	0.211325	0.211325		0.211325	0.211325	0.047733
		N	4	4	4	4	4	4	4	4	4	4	4	4	4	4	4	4	4	4	4	4	4	4	4	4	4	4	4	0	4	4	4
	Attracting innovative companies	Pearson Correlation	0.57735	0.707107	0	1	0.57735	0.57735	0	0	0	0.57735	.b	0.301511	0	0.707107	0	0.57735	-1,000**	.b	0.707107	0.57735	0.57735	0.57735	0.301511	0.301511	0	-0.57735	-0.57735	.b	0.57735	-0.57735	0.301511
		Sig. (1-tailed)	0.211325	0.146447	0.5		0.211325	0.211325	0.5	0.5	0.5	0.211325		0.349244	0.5	0.146447	0.5	0.211325	0		0.146447	0.211325	0.211325	0.211325	0.349244	0.349244	0.5	0.211325	0.211325		0.211325	0.211325	0.349244
		N	4	4	4	4	4	4	4	4	4	4	4	4	4	4	4	4	4	4	4	4	4	4	4	4	4	4	4	0	4	4	4
	Data aggregation	Pearson Correlation	-0.333333	0	-0.57735	0.57735	1	0.333333	0.57735	-0.57735	0.57735	-0.333333	.b	-0.174078	-0.57735	0	-0.57735	1,000**	-0.57735	.b	0.816497	1,000**	1,000**	0.333333	-0.522233	-0.174078	-0.57735	0.333333	0.333333	.b	0.333333	0.333333	-0.174078
		Sig. (1-tailed)	0.333333	0.5	0.211325	0.211325		0.333333	0.211325	0.211325	0.211325	0.333333		0.412961	0.211325	0.5	0.211325	0	0.211325		0.0917517	0	0	0.333333	0.238884	0.412961	0.211325	0.333333	0.333333		0.333333	0.333333	0.412961
		N	4	4	4	4	4	4	4	4	4	4	4	4	4	4	4	4	4	4	4	4	4	4	4	4	4	4	4	0	4	4	4
	Data processing	Pearson Correlation	0.333333	0	0.57735	0.57735	0.333333	1	0.57735	0.57735	-0.57735	0.333333	.b	0.870388	0.57735	0.816497	0.57735	0.333333	-0.57735	.b	0.816497	0.333333	0.333333	1,000**	0.522233	0.870388	0.57735	-0.333333	-0.333333	.b	1,000**	-0.333333	0.870388
		Sig. (1-tailed)	0.333333	0.5	0.211325	0.211325	0.333333		0.211325	0.211325	0.211325	0.333333		0.0648059	0.211325	0.0917517	0.211325	0.333333	0.211325		0.0917517	0.333333	0.333333	0	0.238884	0.0648059	0.211325	0.333333	0.333333		0	0.333333	0.0648059
		N	4	4	4	4	4	4	4	4	4	4	4	4	4	4	4	4	4	4	4	4	4	4	4	4	4	4	4	0	4	4	4
	Data real-time analysis	Pearson Correlation	-0.57735	-0.707107	0	0	0.57735	0.57735	1	0	0	-0.57735	.b	0.301511	0	0	0	0.57735	0	.b	0.707107	0.57735	0.57735	0.57735	-0.301511	0.301511	0	0.57735	0.57735	.b	0.57735	0.57735	0.301511
		Sig. (1-tailed)	0.211325	0.146447	0.5	0.5	0.211325	0.211325		0.5	0.5	0.211325		0.349244	0.5	0.5	0.5	0.211325	0.5		0.146447	0.211325	0.211325	0.211325	0.349244	0.349244	0.5	0.211325	0.211325		0.211325	0.211325	0.349244
		N	4	4	4	4	4	4	4	4	4	4	4	4	4	4	4	4	4	4	4	4	4	4	4	4	4	4	4	0	4	4	4
	Supra-national and national investment	Pearson Correlation	0.57735	0	1,000**	0	-0.57735	0.57735	0	1	-1,000**	0.57735	.b	,905*	1,000**	0.707107	1,000**	-0.57735	0	.b	0	-0.57735	-0.57735	0.57735	,905*	,905*	1,000**	-0.57735	-0.57735	.b	0.57735	-0.57735	,905*
		Sig. (1-tailed)	0.211325	0.5	0	0.5	0.211325	0.211325	0.5		0	0.211325		0.047733	0	0.146447	0	0.211325	0.5		0.5	0.211325	0.211325	0.211325	0.047733	0.047733	0	0.211325	0.211325		0.211325	0.211325	0.047733
		N	4	4	4	4	4	4	4	4	4	4	4	4	4	4	4	4	4	4	4	4	4	4	4	4	4	4	4	0	4	4	4
	Local government investment	Pearson Correlation	-0.57735	0	-1,000**	0	0.57735	-0.57735	0	-1,000**	1	-0.57735	.b	-,905*	-1,000**	-0.707107	-1,000**	0.57735	0	.b	0	0.57735	0.57735	-0.57735	-,905*	-,905*	-1,000**	0.57735	0.57735	.b	-0.57735	0.57735	-,905*
		Sig. (1-tailed)	0.211325	0.5	0	0.5	0.211325	0.211325	0.5	0		0.211325		0.047733	0	0.146447	0	0.211325	0.5		0.5	0.211325	0.211325	0.211325	0.047733	0.047733	0	0.211325	0.211325		0.211325	0.211325	0.047733
		N	4	4	4	4	4	4	4	4	4	4	4	4	4	4	4	4	4	4	4	4	4	4	4	4	4	4	4	0	4	4	4
	Public-private investment	Pearson Correlation	1,000**	0.816497	0.57735	0.57735	-0.333333	0.333333	-0.57735	0.57735	-0.57735	1	.b	0.522233	0.57735	0.816497	0.57735	-0.333333	-0.57735	.b	0	-0.333333	-0.333333	0.333333	0.870388	0.522233	0.57735	-1,000**	-1,000**	.b	0.333333	-1,000**	0.522233
		Sig. (1-tailed)	0	0.0917517	0.211325	0.211325	0.333333	0.333333	0.211325	0.211325	0.211325			0.238884	0.211325	0.0917517	0.211325	0.333333	0.211325		0.5	0.333333	0.333333	0.333333	0.0648059	0.238884	0.211325	0	0		0.333333	0	0.238884
		N	4	4	4	4	4	4	4	4	4	4	4	4	4	4	4	4	4	4	4	4	4	4	4	4	4	4	4	0	4	4	4
	Foreign investment	Pearson Correlation	.b	.b	.b	.b	.b	.b	.b	.b	.b	.b	.b	.b	.b	.b	.b	.b	.b	.b	.b	.b	.b	.b	.b	.b	.b	.b	.b	.b	.b	.b	.b
		Sig. (1-tailed)
		N	4	4	4	4	4	4	4	4	4	4	4	4	4	4	4	4	4	4	4	4	4	4	4	4	4	4	4	0	4	4	4
	Smart transportation infrastuctures	Pearson Correlation	0.522233	0	,905*	0.301511	-0.174078	0.870388	0.301511	,905*	-,905*	0.522233	.b	1	,905*	0.852803	,905*	-0.174078	-0.301511	.b	0.426401	-0.174078	-0.174078	0.870388	0.818182	1,000**	,905*	-0.522233	-0.522233	.b	0.870388	-0.522233	1,000**
		Sig. (1-tailed)	0.238884	0.5	0.047733	0.349244	0.412961	0.0648059	0.349244	0.047733	0.047733	0.238884			0.047733	0.0735986	0.047733	0.412961	0.349244		0.286799	0.412961	0.412961	0.0648059	0.0909091	0	0.047733	0.238884	0.238884		0.0648059	0.238884	0
		N	4	4	4	4	4	4	4	4	4	4	4	4	4	4	4	4	4	4	4	4	4	4	4	4	4	4	4	0	4	4	4
	Smart public transportation	Pearson Correlation	0.57735	0	1,000**	0	-0.57735	0.57735	0	1,000**	-1,000**	0.57735	.b	,905*	1	0.707107	1,000**	-0.57735	0	.b	0	-0.57735	-0.57735	0.57735	,905*	,905*	1,000**	-0.57735	-0.57735	.b	0.57735	-0.57735	,905*
		Sig. (1-tailed)	0.211325	0.5	0	0.5	0.211325	0.211325	0.5	0	0	0.211325		0.047733		0.146447	0	0.211325	0.5		0.5	0.211325	0.211325	0.211325	0.047733	0.047733	0	0.211325	0.211325		0.211325	0.211325	0.047733
		N	4	4	4	4	4	4	4	4	4	4	4	4	4	4	4	4	4	4	4	4	4	4	4	4	4	4	4	0	4	4	4
	Smart private transportation	Pearson Correlation	0.816497	0.5	0.707107	0.707107	0	0.816497	0	0.707107	-0.707107	0.816497	.b	0.852803	0.707107	1	0.707107	0	-0.707107	.b	0.5	0	0	0.816497	0.852803	0.852803	0.707107	-0.816497	-0.816497	.b	0.816497	-0.816497	0.852803
		Sig. (1-tailed)	0.0917517	0.25	0.146447	0.146447	0.5	0.0917517	0.5	0.146447	0.146447	0.0917517		0.0735986	0.146447		0.146447	0.5	0.146447		0.25	0.5	0.5	0.0917517	0.0735986	0.0735986	0.146447	0.0917517	0.0917517		0.0917517	0.0917517	0.0735986
		N	4	4	4	4	4	4	4	4	4	4	4	4	4	4	4	4	4	4	4	4	4	4	4	4	4	4	4	0	4	4	4
	Renewable energy	Pearson Correlation	0.57735	0	1,000**	0	-0.57735	0.57735	0	1,000**	-1,000**	0.57735	.b	,905*	1,000**	0.707107	1	-0.57735	0	.b	0	-0.57735	-0.57735	0.57735	,905*	,905*	1,000**	-0.57735	-0.57735	.b	0.57735	-0.57735	,905*
		Sig. (1-tailed)	0.211325	0.5	0	0.5	0.211325	0.211325	0.5	0	0	0.211325		0.047733	0	0.146447		0.211325	0.5		0.5	0.211325	0.211325	0.211325	0.047733	0.047733	0	0.211325	0.211325		0.211325	0.211325	0.047733
		N	4	4	4	4	4	4	4	4	4	4	4	4	4	4	4	4	4	4	4	4	4	4	4	4	4	4	4	0	4	4	4
	Buildings energy efficiency	Pearson Correlation	-0.333333	0	-0.57735	0.57735	1,000**	0.333333	0.57735	-0.57735	0.57735	-0.333333	.b	-0.174078	-0.57735	0	-0.57735	1	-0.57735	.b	0.816497	1,000**	1,000**	0.333333	-0.522233	-0.174078	-0.57735	0.333333	0.333333	.b	0.333333	0.333333	-0.174078
		Sig. (1-tailed)	0.333333	0.5	0.211325	0.211325	0	0.333333	0.211325	0.211325	0.211325	0.333333		0.412961	0.211325	0.5	0.211325		0.211325		0.0917517	0	0	0.333333	0.238884	0.412961	0.211325	0.333333	0.333333		0.333333	0.333333	0.412961
		N	4	4	4	4	4	4	4	4	4	4	4	4	4	4	4	4	4	4	4	4	4	4	4	4	4	4	4	0	4	4	4
	New technologies for utilities	Pearson Correlation	-0.57735	-0.707107	0	-1,000**	-0.57735	-0.57735	0	0	0	-0.57735	.b	-0.301511	0	-0.707107	0	-0.57735	1	.b	-0.707107	-0.57735	-0.57735	-0.57735	-0.301511	-0.301511	0	0.57735	0.57735	.b	-0.57735	0.57735	-0.301511
		Sig. (1-tailed)	0.211325	0.146447	0.5	0	0.211325	0.211325	0.5	0.5	0.5	0.211325		0.349244	0.5	0.146447	0.5	0.211325			0.146447	0.211325	0.211325	0.211325	0.349244	0.349244	0.5	0.211325	0.211325		0.211325	0.211325	0.349244
		N	4	4	4	4	4	4	4	4	4	4	4	4	4	4	4	4	4	4	4	4	4	4	4	4	4	4	4	0	4	4	4
	Smart Energy average	Pearson Correlation	.b	.b	.b	.b	.b	.b	.b	.b	.b	.b	.b	.b	.b	.b	.b	.b	.b	.b	.b	.b	.b	.b	.b	.b	.b	.b	.b	.b	.b	.b	.b
		Sig. (1-tailed)
		N	4	4	4	4	4	4	4	4	4	4	4	4	4	4	4	4	4	4	4	4	4	4	4	4	4	4	4	0	4	4	4
	Smart health monitoring systems	Pearson Correlation	0	0	0	0.707107	0.816497	0.816497	0.707107	0	0	0	.b	0.426401	0	0.5	0	0.816497	-0.707107	.b	1	0.816497	0.816497	0.816497	0	0.426401	0	0	0	.b	0.816497	0	0.426401
		Sig. (1-tailed)	0.5	0.5	0.5	0.146447	0.0917517	0.0917517	0.146447	0.5	0.5	0.5		0.286799	0.5	0.25	0.5	0.0917517	0.146447			0.0917517	0.0917517	0.0917517	0.5	0.286799	0.5	0.5	0.5		0.0917517	0.5	0.286799
		N	4	4	4	4	4	4	4	4	4	4	4	4	4	4	4	4	4	4	4	4	4	4	4	4	4	4	4	0	4	4	4
	Smart health management and information applications	Pearson Correlation	-0.333333	0	-0.57735	0.57735	1,000**	0.333333	0.57735	-0.57735	0.57735	-0.333333	.b	-0.174078	-0.57735	0	-0.57735	1,000**	-0.57735	.b	0.816497	1	1,000**	0.333333	-0.522233	-0.174078	-0.57735	0.333333	0.333333	.b	0.333333	0.333333	-0.174078
		Sig. (1-tailed)	0.333333	0.5	0.211325	0.211325	0	0.333333	0.211325	0.211325	0.211325	0.333333		0.412961	0.211325	0.5	0.211325	0	0.211325		0.0917517		0	0.333333	0.238884	0.412961	0.211325	0.333333	0.333333		0.333333	0.333333	0.412961
		N	4	4	4	4	4	4	4	4	4	4	4	4	4	4	4	4	4	4	4	4	4	4	4	4	4	4	4	0	4	4	4
	Smart health average	Pearson Correlation	-0.333333	0	-0.57735	0.57735	1,000**	0.333333	0.57735	-0.57735	0.57735	-0.333333	.b	-0.174078	-0.57735	0	-0.57735	1,000**	-0.57735	.b	0.816497	1,000**	1	0.333333	-0.522233	-0.174078	-0.57735	0.333333	0.333333	.b	0.333333	0.333333	-0.174078
		Sig. (1-tailed)	0.333333	0.5	0.211325	0.211325	0	0.333333	0.211325	0.211325	0.211325	0.333333		0.412961	0.211325	0.5	0.211325	0	0.211325		0.0917517	0		0.333333	0.238884	0.412961	0.211325	0.333333	0.333333		0.333333	0.333333	0.412961
		N	4	4	4	4	4	4	4	4	4	4	4	4	4	4	4	4	4	4	4	4	4	4	4	4	4	4	4	0	4	4	4
	One-way communication	Pearson Correlation	0.333333	0	0.57735	0.57735	0.333333	1,000**	0.57735	0.57735	-0.57735	0.333333	.b	0.870388	0.57735	0.816497	0.57735	0.333333	-0.57735	.b	0.816497	0.333333	0.333333	1	0.522233	0.870388	0.57735	-0.333333	-0.333333	.b	1,000**	-0.333333	0.870388
		Sig. (1-tailed)	0.333333	0.5	0.211325	0.211325	0.333333	0	0.211325	0.211325	0.211325	0.333333		0.0648059	0.211325	0.0917517	0.211325	0.333333	0.211325		0.0917517	0.333333	0.333333		0.238884	0.0648059	0.211325	0.333333	0.333333		0	0.333333	0.0648059
		N	4	4	4	4	4	4	4	4	4	4	4	4	4	4	4	4	4	4	4	4	4	4	4	4	4	4	4	0	4	4	4
	Two-way communication	Pearson Correlation	0.870388	0.426401	,905*	0.301511	-0.522233	0.522233	-0.301511	,905*	-,905*	0.870388	.b	0.818182	,905*	0.852803	,905*	-0.522233	-0.301511	.b	0	-0.522233	-0.522233	0.522233	1	0.818182	,905*	-0.870388	-0.870388	.b	0.522233	-0.870388	0.818182
		Sig. (1-tailed)	0.0648059	0.286799	0.047733	0.349244	0.238884	0.238884	0.349244	0.047733	0.047733	0.0648059		0.0909091	0.047733	0.0735986	0.047733	0.238884	0.349244		0.5	0.238884	0.238884	0.238884		0.0909091	0.047733	0.0648059	0.0648059		0.238884	0.0648059	0.0909091
		N	4	4	4	4	4	4	4	4	4	4	4	4	4	4	4	4	4	4	4	4	4	4	4	4	4	4	4	0	4	4	4
	Co-creating and co-designing	Pearson Correlation	0.522233	0	,905*	0.301511	-0.174078	0.870388	0.301511	,905*	-,905*	0.522233	.b	1,000**	,905*	0.852803	,905*	-0.174078	-0.301511	.b	0.426401	-0.174078	-0.174078	0.870388	0.818182	1	,905*	-0.522233	-0.522233	.b	0.870388	-0.522233	1,000**
		Sig. (1-tailed)	0.238884	0.5	0.047733	0.349244	0.412961	0.0648059	0.349244	0.047733	0.047733	0.238884		0	0.047733	0.0735986	0.047733	0.412961	0.349244		0.286799	0.412961	0.412961	0.0648059	0.0909091		0.047733	0.238884	0.238884		0.0648059	0.238884	0
		N	4	4	4	4	4	4	4	4	4	4	4	4	4	4	4	4	4	4	4	4	4	4	4	4	4	4	4	0	4	4	4
	Smart city average	Pearson Correlation	0.57735	0	1,000**	0	-0.57735	0.57735	0	1,000**	-1,000**	0.57735	.b	,905*	1,000**	0.707107	1,000**	-0.57735	0	.b	0	-0.57735	-0.57735	0.57735	,905*	,905*	1	-0.57735	-0.57735	.b	0.57735	-0.57735	,905*
		Sig. (1-tailed)	0.211325	0.5	0	0.5	0.211325	0.211325	0.5	0	0	0.211325		0.047733	0	0.146447	0	0.211325	0.5		0.5	0.211325	0.211325	0.211325	0.047733	0.047733		0.211325	0.211325		0.211325	0.211325	0.047733
		N	4	4	4	4	4	4	4	4	4	4	4	4	4	4	4	4	4	4	4	4	4	4	4	4	4	4	4	0	4	4	4
	Smart administration	Pearson Correlation	-1,000**	-0.816497	-0.57735	-0.57735	0.333333	-0.333333	0.57735	-0.57735	0.57735	-1,000**	.b	-0.522233	-0.57735	-0.816497	-0.57735	0.333333	0.57735	.b	0	0.333333	0.333333	-0.333333	-0.870388	-0.522233	-0.57735	1	1,000**	.b	-0.333333	1,000**	-0.522233
		Sig. (1-tailed)	0	0.0917517	0.211325	0.211325	0.333333	0.333333	0.211325	0.211325	0.211325	0		0.238884	0.211325	0.0917517	0.211325	0.333333	0.211325		0.5	0.333333	0.333333	0.333333	0.0648059	0.238884	0.211325		0		0.333333	0	0.238884
		N	4	4	4	4	4	4	4	4	4	4	4	4	4	4	4	4	4	4	4	4	4	4	4	4	4	4	4	0	4	4	4
	Smart interaction	Pearson Correlation	-1,000**	-0.816497	-0.57735	-0.57735	0.333333	-0.333333	0.57735	-0.57735	0.57735	-1,000**	.b	-0.522233	-0.57735	-0.816497	-0.57735	0.333333	0.57735	.b	0	0.333333	0.333333	-0.333333	-0.870388	-0.522233	-0.57735	1,000**	1	.b	-0.333333	1,000**	-0.522233
		Sig. (1-tailed)	0	0.0917517	0.211325	0.211325	0.333333	0.333333	0.211325	0.211325	0.211325	0		0.238884	0.211325	0.0917517	0.211325	0.333333	0.211325		0.5	0.333333	0.333333	0.333333	0.0648059	0.238884	0.211325	0			0.333333	0	0.238884
		N	4	4	4	4	4	4	4	4	4	4	4	4	4	4	4	4	4	4	4	4	4	4	4	4	4	4	4	0	4	4	4
	Smart security and safety	Pearson Correlation	.b	.b	.b	.b	.b	.b	.b	.b	.b	.b	.b	.b	.b	.b	.b	.b	.b	.b	.b	.b	.b	.b	.b	.b	.b	.b	.b	.b	.b	.b	.b
		Sig. (1-tailed)
		N	0	0	0	0	0	0	0	0	0	0	0	0	0	0	0	0	0	0	0	0	0	0	0	0	0	0	0	0	0	0	0
	Smart policies	Pearson Correlation	0.333333	0	0.57735	0.57735	0.333333	1,000**	0.57735	0.57735	-0.57735	0.333333	.b	0.870388	0.57735	0.816497	0.57735	0.333333	-0.57735	.b	0.816497	0.333333	0.333333	1,000**	0.522233	0.870388	0.57735	-0.333333	-0.333333	.b	1	-0.333333	0.870388
		Sig. (1-tailed)	0.333333	0.5	0.211325	0.211325	0.333333	0	0.211325	0.211325	0.211325	0.333333		0.0648059	0.211325	0.0917517	0.211325	0.333333	0.211325		0.0917517	0.333333	0.333333	0	0.238884	0.0648059	0.211325	0.333333	0.333333			0.333333	0.0648059
		N	4	4	4	4	4	4	4	4	4	4	4	4	4	4	4	4	4	4	4	4	4	4	4	4	4	4	4	0	4	4	4
	Smart governance average	Pearson Correlation	-1,000**	-0.816497	-0.57735	-0.57735	0.333333	-0.333333	0.57735	-0.57735	0.57735	-1,000**	.b	-0.522233	-0.57735	-0.816497	-0.57735	0.333333	0.57735	.b	0	0.333333	0.333333	-0.333333	-0.870388	-0.522233	-0.57735	1,000**	1,000**	.b	-0.333333	1	-0.522233
		Sig. (1-tailed)	0	0.0917517	0.211325	0.211325	0.333333	0.333333	0.211325	0.211325	0.211325	0		0.238884	0.211325	0.0917517	0.211325	0.333333	0.211325		0.5	0.333333	0.333333	0.333333	0.0648059	0.238884	0.211325	0	0		0.333333		0.238884
		N	4	4	4	4	4	4	4	4	4	4	4	4	4	4	4	4	4	4	4	4	4	4	4	4	4	4	4	0	4	4	4
	**. Correlation is significant at the 0.01 level (1-tailed).
	*. Correlation is significant at the 0.05 level (1-tailed).
	b. Cannot be computed because at least one of the variables is constant.

## Sheet: Qualitative analysis of the des
Pathways	Origin (opportunity window)	Throughput
		Management of input resources	Policy	Leadership	Knowledge & Innovation	Coordination of actors
Amsterdam	City of A'dam and Alliander want to build smart city to lower CO2 emissions.	Second largest internet exchange point in the world,	Structural vision 2040: economy and sustainability	Economic Board	Smart City Academy and AMS.	ASC platform
		High technology readiness level	Specific policy in place to promote innovation in coordination with national and European policies		Smart Entrepreneurial Lab	Chief Technology Officer (CTO)
	EU project funding and aligned with Horizon2020	modern technology infrastructures	StartupAmsterdam		Amsterdam Science Park
		City Data portal	ASC has the open-house programs and open meeting ups to empower citizens	AMS	Living Labs
		ASC platform (to generate ideas)			European Union’s DECODE project aiming to return data sovereignty to the citizens.
Barcelona	Strategy by the City of Barcelona to create a more sustainable, smart, and inclusive path for development (2011)	Municipal data office for public data sovereignty	Smart City Expo and World Congress	City Council, Barcelona Provincial Council, and Area Metropolitana de Barcelona (AMB).	Smart innovation; virtual lab	22@ innovation district (to coordinate knowledge partners)
		CityOS, Open Data Bcn, and Monitoring Gentrification	Smart City Program		Institute for Advanced Architecture of Catalonia (IAAC)
	EU project funding and aligned with Horizon2020	‘Multi-tenant DIBA’ platform	‘Barcelona Smart City Strategy, Planning and Implementation’		Fab Lab
		Several platorms and applications that support smart mobility			Development of a community of citizens and developers, and installations for SMEs (early stage).
			Subsidies to support solar energy installation		European Union’s DECODE project aiming to return data sovereignty to the citizens.
		‘Dicdim Barcelona’, a participatory democracy (digital) platform for communicating and empowering citizens			22@ innovation district
Dubai	Vision of Ruler of Dubai	Khazna Data Centers	Smart Dubai Strategy	Executive office for Dubai smart city program was established.	Dubai International Academic City (DIAC)	Having all city stakeholders on board is a cornerstone of Smart Dubai strategy.
		AI Lab (with IBM)	major training programs to develop human resources (train public staff; civil servants).	Visionary leadership to foster happiness (Ruler of Dubai)	Dubai Knowledge Village	Setting up a champion in line with the overarching policy of developing the smart city
			Global Block chain Challenge, Dubai Smart City Accelerator and, Dubai Future Accelerators		Dubai Internet city	Happiness champions
		Dubai Pulse; central platform for providing compute, storage, and analytic services	Dubai Data	Dubai Data Establishment	Science parks	Hi-tech free zones
			AI roadmap	Dubai Electricity and Water Authority
			Paperless government policy is the goal for smart administration	Dubai Health Authority
		Dubai Now’ platform (to support e-services to citizens)		Dubai Supreme Council of Energy		Smart Dubai Office
Masdar	Abu Dhabi want to pursue the world's most sustainable city (2006)	Data management driving innovative solutions	Smart transportation policies	Mubadala Investment Company	Research & Academia	Large scale free economic zone
		IoT platform for increased health, productivity and sustainability (with Huawei)		Holistic approach to develop renewable energy and sustainability by creating the value chain from research to investments.	Masdar Institute of Science and Technology (MIST)
				Ruler of Abu Dhabi	Honeywell Masdar Innovation Center	Sustainability week platform
					Mobility Urban Value project
